# Supplementary material for: Using Massive Parallel Sequencing for the Development, Validation, and Application of Population Genetics Markers in the Invasive Bivalve Zebra Mussel (Dreissena polymorpha)
Source: PubMed Central journal article supplement (PMC4364119; doi:10.1371/journal.pone.0120732), 2015-03-17
Supplement: pone.0120732.s001.pdf [file pone.0120732.s001.pdf]

S1\_Table. Samples analyzed in this study with their genetic variability statistics.

*n*, number of samples; *A*, number of alleles (average per locus); *Ar*, allelic richness; *Hs*, gene diversity.

| Study number | Study site                   | Basin                 | Coordinates |              | Date of collection | <i>n</i> | <i>A</i>  | <i>Ar</i> | <i>Hs</i> |
|--------------|------------------------------|-----------------------|-------------|--------------|--------------------|----------|-----------|-----------|-----------|
|              |                              |                       | Latitude, N | Longitude, E |                    |          |           |           |           |
| 1            | Sobron Reservoir             | Ebro River basin      | 42° 46'     | -3° 07'      | 2010               | 8        | 48 (3.43) | 2.14      | 0.53      |
| 2            | Canal Imperial Aragón        | Ebro River basin      | 41° 36'     | -0° 51'      | 2011               | 8        | 50 (3.57) | 2.33      | 0.61      |
| 3            | Ribarroja Badia-Tucana Wharf | Ebro River basin      | 41° 14'     | 0° 25'       | 2011               | 8        | 46 (3.29) | 2.16      | 0.54      |
| 4            | Ribarroja Reservoir          | Ebro River basin      | 41° 14'     | 0° 25'       | 2011               | 8        | 46 (3.29) | 2.29      | 0.60      |
| 5            | Delta of Ebro River          | Ebro River basin      | 40° 42'     | 0° 49'       | 2010               | 8        | 50 (3.57) | 2.31      | 0.60      |
| 6            | La Baells Reservoir          | Llobregat River basin | 42° 07'     | 1° 53'       | 2012               | 8        | 43 (3.07) | 2.06      | 0.50      |
| TOTAL/AVERGE |                              |                       |             |              |                    | 48       | 67 (4.79) | 2.21      | 0.56      |
