# Supplementary material for: Using Massive Parallel Sequencing for the Development, Validation, and Application of Population Genetics Markers in the Invasive Bivalve Zebra Mussel (Dreissena polymorpha)
Source: PubMed Central journal article supplement (PMC4364119; doi:10.1371/journal.pone.0120732), 2015-03-17
Supplement: pone.0120732.s002.pdf [file pone.0120732.s002.pdf]

S2\_Table. Number (and percentage) of microsatellite types based on the size of the repeat motif.

| % of each motif<br>Repeat Size | SSR isolation and primer design |                                         |                                    |
|--------------------------------|---------------------------------|-----------------------------------------|------------------------------------|
|                                | SSR<br>identified<br>(%)        | Potentially<br>amplifically<br>loci (%) | Loci<br>primers<br>designed<br>(%) |
| Dinucleotide                   | 19<br>(6.60)                    | 8<br>(7.77)                             | 8<br>(8.60)                        |
| Trinucleotide                  | 109<br>(37.85)                  | 41<br>(39.81)                           | 39<br>(41.94)                      |
| Tetranucleotide                | 114<br>(39.58)                  | 45<br>(43.69)                           | 43<br>(46.24)                      |
| Pentanucleotide                | 46<br>(15.97)                   | 9<br>(8.74)                             | 4<br>(4.30)                        |
| Hexanucleotide                 | -                               | -                                       | -                                  |
| TOTAL                          | 288                             | 103                                     | 93                                 |
