# Supplementary material for: Using Massive Parallel Sequencing for the Development, Validation, and Application of Population Genetics Markers in the Invasive Bivalve Zebra Mussel (Dreissena polymorpha)
Source: PubMed Central journal article supplement (PMC4364119; doi:10.1371/journal.pone.0120732), 2015-03-17
Supplement: pone.0120732.s003.pdf [file pone.0120732.s003.pdf]

S3\_Table. Description of the 93 validated microsatellites.

Repeat motif, teoric size in base pairs (bp), forward (*F*) and reverse (*R*) (5'– 3') primer sequences and GenBank accession number.

| Locus | Repeat motif                                                                                               | Teoric Size (bp) | Primers Forward ( <i>F</i> ) and Reverse ( <i>R</i> ) 5' → 3'                 |               | GenBank Accession |
|-------|------------------------------------------------------------------------------------------------------------|------------------|-------------------------------------------------------------------------------|---------------|-------------------|
| Dp1   | [ATA] <sub>21</sub>                                                                                        | 262              | <i>F</i> : GGATTTTTCTCCCGTGGAAT<br><i>R</i> : CGGTAGCGTTCTTTCACAA             | Polymorphic   | JQ812984          |
| Dp2   | [TGA] <sub>17</sub>                                                                                        | 409              | <i>F</i> : GCTACCGGAGCTCAACCTAA<br><i>R</i> : ACGTCGAACCCCTGTCAAAAA           | Polymorphic   | JQ812985          |
| Dp3   | [AT] <sub>12</sub>                                                                                         | 105              | <i>F</i> : TGTTAACTTGCCATGCTATTTCG<br><i>R</i> : ATCTCAGGGGTCAACAGG           | Validated     | KP274952          |
| Dp4   | [CTA] <sub>59</sub> 2 [CCA] <sub>25</sub>                                                                  | 373              | <i>F</i> : CCCATATTTACTGCCAGTGC<br><i>R</i> : GCAGCCATTGTGTGAATACG            | Not amplified | -                 |
| Dp5   | [TG] <sub>10</sub>                                                                                         | 148              | <i>F</i> : TTTCTTTTGGGAAGTCGACAC<br><i>R</i> : ATTAGTTGCCCGGTTTCCAT           | Validated     | KP274953          |
| Dp6   | [GGCT] <sub>11</sub>                                                                                       | 256              | <i>F</i> : TAACCAGTTTTCCGAAGGA<br><i>R</i> : GGCCATTTTTGACCTTTGAA             | Validated     | KP274954          |
| Dp7   | [TAA] <sub>11</sub> 4 [ATT] <sub>5</sub> 48 [TAT] <sub>11</sub><br>71 [ATA] <sub>14</sub>                  | 417              | <i>F</i> : GGAATACCGGGTGCTGTAGA<br><i>R</i> : GACGTGCGTCACAATAGGTG            | Polymorphic   | JQ812986          |
| Dp8   | [ATC] <sub>10</sub> [TCG] <sub>7</sub>                                                                     | 303              | <i>F</i> : TCTATGCTCGCCAAAACGTA<br><i>R</i> : CGGCGAAACAGTTACACAAC            | Validated     | KP274955          |
| Dp9   | [CTA] <sub>10</sub> 36 [CTA] <sub>19</sub>                                                                 | 357              | <i>F</i> : AATATGGGCTTCCATCCTGA<br><i>R</i> : TGGTTATAGTGGTAGTGGTAGTGG        | Validated     | KP274956          |
| Dp10  | [TGA] <sub>5</sub> 37 [TGA] <sub>10</sub> 36<br>[TGA] <sub>14</sub>                                        | 415              | <i>F</i> : TTTGGGATATTTGGCTGCT<br><i>R</i> : TCCGATAAACATCGCTGTC              | Validated     | KP274957          |
| Dp11  | [CAA] <sub>22</sub> [CAG] <sub>19</sub> 79 [CTA] <sub>8</sub><br>66 [CTA] <sub>23</sub> [CTG] <sub>5</sub> | 436              | <i>F</i> : ATGACTTGTAGAAATTGCTTTGAA<br><i>R</i> : GAACACCTTACACTTACAAATAGTCAA | Validated     | KP274958          |
| Dp12  | [ATT] <sub>16</sub>                                                                                        | 254              | <i>F</i> : CGATATACAATTGCGCCAAA<br><i>R</i> : CAAAATAGGAATTTTGAGTTTGTGAA      | Validated     | KP274959          |
| Dp13  | [CA] <sub>15</sub>                                                                                         | 224              | <i>F</i> : AACACAGGCGCATAACACAC                                               | Validated     | KP274960          |

|      |                      |     |                                                          |               |          |
|------|----------------------|-----|----------------------------------------------------------|---------------|----------|
| Dp14 | [ACA] <sub>8</sub>   | 139 | R: CATAAGCGCACTTCGGTACA<br>F: AAATTTAAATATAAACACGCATTGTG | Validated     | KP274961 |
| Dp15 | [ATG] <sub>56</sub>  | 300 | R: AAAACAAAATCATAACGCATTGGA<br>F: TTTGTTTTACGTGGCAGCA    | Not amplified | -        |
| Dp16 | [GAT] <sub>10</sub>  | 212 | R: TGAAACAAGGAAATGAGGACCTA<br>F: ACAATACTCCGCTCCGAATC    | Validated     | KP274962 |
| Dp17 | [TGCG] <sub>7</sub>  | 150 | R: CGACGCGCGATATTTTATTA<br>F: TGCTCCCTCCCTCCTTAAT        | Validated     | KP274963 |
| Dp18 | [GTCC] <sub>13</sub> | 104 | R: AAAAATGTGGTAGCCCTAGATCC<br>F: AGAGGCGGAGGGATATTGTT    | Validated     | KP274964 |
| Dp19 | [AT] <sub>17</sub>   | 377 | R: TATGGCTCCGGACACAAAAG<br>F: TGGGATATTAATTTGGCTTCAA     | Validated     | KP274965 |
| Dp20 | [ATC] <sub>24</sub>  | 224 | R: CAATTATGGCTGACCAAGCA<br>F: CGAAAAACATATCACGCTTTCA     | Validated     | KP274966 |
| Dp21 | [TCCG] <sub>11</sub> | 416 | R: TCGTGTGTTGCTGGTTCTGA<br>F: TTATCCCCACGCTTTTTGAA       | Not amplified | -        |
| Dp22 | [TA] <sub>23</sub>   | 246 | R: GAAATTTTTGGTGGGTGTGG<br>F: TGCATGAGTGGTGTCAATGT       | Validated     | KP274967 |
| Dp23 | [TA] <sub>18</sub>   | 285 | R: GTCCTCTGCACAAACCATGA<br>F: TAGTCGCATGCATGAGTGGT       | Validated     | KP274968 |
| Dp24 | [TA] <sub>11</sub>   | 286 | R: GGGCATATGTCATCCTACGG<br>F: CCCAGACTGCCCATATCCT        | Validated     | KP274969 |
| Dp25 | [CTG] <sub>43</sub>  | 341 | R: CACTGGAACACCAGTCATGC<br>F: TGCAATCTTGAGAATTGTGG       | Not amplified | -        |
| Dp26 | [CGGA] <sub>8</sub>  | 117 | R: CACAACCAGCGGTAGCATT<br>F: TTCAATGAAATCCGCCAAAAG       | Validated     | KP274970 |
| Dp27 | [TAG] <sub>18</sub>  | 102 | R: GACCTAATTATCCCCGCCATA<br>F: ATGTGCATAGTTTGGGCAGA      | Validated     | KP274971 |
| Dp28 | [TGA] <sub>13</sub>  | 140 | R: CATATTCTACTGCCAGCACCA<br>F: TAGTAGTGACGCTGCTGCTG      | Validated     | KP274972 |
| Dp29 | [CCGC] <sub>9</sub>  | 119 | R: CTTTCATTACAATTTCCACTTT<br>F: TTTGGTGAAGATCGGATGAA     | Validated     | KP274973 |

|      |                                            |     |                                                            |               |          |
|------|--------------------------------------------|-----|------------------------------------------------------------|---------------|----------|
| Dp30 | [TTG] <sub>7</sub> 58 [GTT] <sub>6</sub>   | 218 | R: CGGGACGTATTATGTGAAACC<br>F: GCGTTGGTGTGTGTACGTC         | Polymorphic   | JQ812987 |
| Dp31 | [ATT] <sub>13</sub>                        | 267 | R: CTGAGCATCTCACCGTCAAA<br>F: CGAGTTTCTTGACGTTTCA          | Polymorphic   | JQ812988 |
| Dp32 | [ATC] <sub>14</sub> 24 [TCG] <sub>12</sub> | 348 | R: TGTTATTTTAAGAAGGCCACATTG<br>F: CATCGTTATGGTCGTCATCG     | Validated     | KP274974 |
| Dp33 | [CAT] <sub>6</sub> [TCT] <sub>8</sub>      | 447 | R: TTTTAGCGACAAATTGACTTGG<br>F: ATCATCATCGTCGTCGTCGT       | Validated     | KP274975 |
| Dp34 | [CAT] <sub>19</sub>                        | 405 | R: CACAACGGTCCGAAGTCATA<br>F: GCTAAGGGCGACAGTGTGT          | Validated     | KP274976 |
| Dp35 | [GTCTG] <sub>9</sub>                       | 382 | R: AACACAATGATGCTGCTGCT<br>F: ACTGGACAGCAACCAGCTTT         | Validated     | KP274977 |
| Dp36 | [GAAG] <sub>10</sub>                       | 200 | R: TCTGACAACCACCTGAAGGA<br>F: CTTGACCTTGACCCCATGA          | Validated     | KP274978 |
| Dp37 | [ATG] <sub>9</sub>                         | 277 | R: AATAAAATTTTGGCGGAGCA<br>F: TTCCCATCTTAAGTGCAATTGTG      | Validated     | KP274979 |
| Dp38 | [TCCG] <sub>12</sub>                       | 391 | R: TTGGGTCATAGGGAGTCTGG<br>F: TCGTCCAAATGACCAAATGT         | Validated     | KP274980 |
| Dp39 | [GGCG] <sub>11</sub>                       | 389 | R: GCTTTTAGTGTAGGAGGAGATAGTGG<br>F: GACGTCATGGTTCTGAATGG   | Polymorphic   | JQ812989 |
| Dp40 | [TTAA] <sub>7</sub>                        | 110 | R: CCGGACAAGCTCATTTATGG<br>F: GGTCAGAAGATTGGCCTCAA         | Not amplified | -        |
| Dp41 | [TCTG] <sub>8</sub>                        | 113 | R: TCGAAAGGGGGCATAAAAAT<br>F: AGGGGTGGGGCATTTTTAT          | Validated     | KP274981 |
| Dp42 | [GTTG] <sub>9</sub>                        | 239 | R: AGAGCGGACACGAAAAGTGT<br>F: TCGCTTAACCTGACCAGTGA         | Polymorphic   | JQ812990 |
| Dp43 | [TTA] <sub>10</sub>                        | 240 | R: CCAAATATCAAGTTGCCTATCTTCA<br>F: TTGCTCATGATGAAATATGATGT | Polymorphic   | JQ812991 |
| Dp44 | [GACC] <sub>8</sub>                        | 148 | R: ATGCGTTTCACTTTGGCATC<br>F: CCCCAAGCGTCTTGAGTATC         | Polymorphic   | JQ812992 |
| Dp45 | [TGT] <sub>8</sub>                         | 412 | R: TCCTGCCAAGCATGTATGAG<br>F: GCATAACGGCTAAGTTGGTTTT       | Validated     | KP274982 |

|      |                      |     |                                                         |               |          |
|------|----------------------|-----|---------------------------------------------------------|---------------|----------|
| Dp46 | [ACCG] <sub>6</sub>  | 380 | R: TGCTTCGTA CT CAGCGATT<br>F: AGGGGTCATCTGCAAGTCAT     | Validated     | KP274983 |
| Dp47 | [GAGC] <sub>6</sub>  | 434 | R: TGGGGGATATGTGTGTTGTT<br>F: AGGGTGCTGCATTCTTATCG      | Not amplified | -        |
| Dp48 | [TAAA] <sub>5</sub>  | 448 | R: GCTTGTCCAACGCAGCTATT<br>F: TATCCCGGCCCTATAGGAAA      | Validated     | KP274984 |
| Dp49 | [AATA] <sub>5</sub>  | 440 | R: GACAGCTCCCTCATCTTTGC<br>F: TGTCAATGGCGAACAGAGAA      | Validated     | KP274985 |
| Dp50 | [TTA] <sub>6</sub>   | 335 | R: GATTGGCACA AACCTGAAAAA<br>F: GCGCTCGATGTCAATGATTA    | Validated     | KP274986 |
| Dp51 | [AAAT] <sub>5</sub>  | 301 | R: CGCGTGATTTAACAATGTCG<br>F: CACAAC TTTTGATTTT TGACACC | Validated     | KP274987 |
| Dp52 | [AAG] <sub>5</sub>   | 208 | R: ATGCTGTCTGCTGGCGTTAT<br>F: GGCCGTTTTAAATCGTGAAA      | Validated     | KP274988 |
| Dp53 | [TTATA] <sub>6</sub> | 205 | R: TGTTTTGTTTTCCCTTTCTGG<br>F: TAGTGCATGCTGGGTAGCAC     | Validated     | KP274989 |
| Dp54 | [ATC] <sub>5</sub>   | 287 | R: TGGCCTTCCAGGTAAATACG<br>F: TGTCATCGTAAACCCAGTCG      | Validated     | KP274990 |
| Dp55 | [ATACA] <sub>6</sub> | 261 | R: AATGGGCGTAACATTTGCAT<br>F: AGGGTTACACGCACAGGTTC      | Validated     | KP274991 |
| Dp56 | [CCGT] <sub>5</sub>  | 279 | R: CCTACAAAACGCGCACATAC<br>F: CGCAAATGTTCTATTGAGCGTA    | Validated     | KP274992 |
| Dp57 | [AAC] <sub>5</sub>   | 271 | R: CTAAGGTATGGCTCCGGACA<br>F: TCCCCGTAACCAACTAACA       | Not amplified | -        |
| Dp58 | [ACACC] <sub>7</sub> | 205 | R: TCACTCTGGATCAGCAGACG<br>F: AACGACACCGCATCACTCTA      | Validated     | KP274993 |
| Dp59 | [CA] <sub>8</sub>    | 278 | R: TGGTGTGGTGTTTATTGGAA<br>F: AGGGTAGGGTCAACCACAACT     | Not amplified | -        |
| Dp60 | [ATT] <sub>6</sub>   | 138 | R: CAAAATAGTATGCGTCTCGGAAT<br>F: CATGACACA ACTTTCCCTTA  | Validated     | KP274994 |
| Dp61 | [TCCG] <sub>6</sub>  | 121 | R: CCGCTACATACCGATTGACA<br>F: CGGAGGGGACTTATGGTTTT      | Validated     | KP274995 |

|      |                       |     |                                                        |               |          |
|------|-----------------------|-----|--------------------------------------------------------|---------------|----------|
| Dp62 | [ACAG] <sub>5</sub>   | 141 | R: TGCCATCTATCCATGTTCCA<br>F: AGGGATGCTCCACATGAAAT     | Validated     | KP274996 |
| Dp63 | [TGT] <sub>5</sub>    | 125 | R: CTCGGGGGTGAGCTATTGT<br>F: TTGACGCCAACAATAACAGTTT    | Validated     | KP274997 |
| D64  | [TTG] <sub>6</sub>    | 149 | R: ACTGGTGGTGGGAACGATAA<br>F: TGCCAGTAGTGACGTTGGAG     | Validated     | KP274998 |
| Dp65 | [TTA] <sub>5</sub>    | 141 | R: ACAGGTCATGAACCCTCCTC<br>F: TCCTAACATCGATCTGTTCCAA   | Validated     | KP274999 |
| Dp66 | [TGT] <sub>5</sub>    | 141 | R: CGGCTGCTAAGGGGTAAAGT<br>F: GCCGTGGTTCACCTTTTT       | Validated     | KP275000 |
| Dp67 | [GTTG] <sub>7</sub>   | 150 | R: AGCTAATACGCCCATTCGCAT<br>F: GAACATTGTTTTGCCCTGTC    | Validated     | KP275001 |
| Dp68 | [TGTTCC] <sub>5</sub> | 287 | R: CCACTCAAAATGTGCAGCTC<br>F: TGCTACACACCGTATTTGCTG    | Polymorphic   | JQ812993 |
| Dp69 | [GACA] <sub>7</sub>   | 257 | R: ACACGTGGATGGTGTGAAGA<br>F: GGGGTCAGATCAAAATTCCA     | Validated     | KP275002 |
| Dp70 | [TTG] <sub>5</sub>    | 212 | R: TGTCCAGCATCGTCAAAAAG<br>F: GCAGCGACATCAGACAACAT     | Validated     | KP275003 |
| Dp71 | [ACAA] <sub>6</sub>   | 358 | R: TTTCAGCTGTTTTATTGGTATGAA<br>F: CTGCCATCAGCATCTGAAAA | Validated     | KP275004 |
| Dp72 | [GGTA] <sub>8</sub>   | 383 | R: TGACTGGAGTTGAGCACAGG<br>F: TGCACACACATCTTGACCTG     | Polymorphic   | JQ812994 |
| Dp73 | [ACTG] <sub>5</sub>   | 217 | R: GCTGAAGGCACAACATTTGA<br>F: GGATGACCTTCACCTTCACC     | Validated     | KP275005 |
| Dp74 | [CGTC] <sub>9</sub>   | 361 | R: ATCGCCATTGCTTTTTATGC<br>F: ATCCCCTCAAGACGTTTCCT     | Polymorphic   | JQ812995 |
| Dp75 | [ATTT] <sub>6</sub>   | 336 | R: ACCATACCGGTGGCATAAAA<br>F: AAAAACTAGGGTAGGTAGGTACGG | Not amplified | -        |
| Dp76 | [GACG] <sub>9</sub>   | 312 | R: GCACAGCATTGATGTTCTTCT<br>F: AAATCCGCCAAAGAACTTCC    | Validated     | KP275006 |
| Dp77 | [AAAT] <sub>7</sub>   | 259 | R: AAAAGGGGATTTGCCGTAAC<br>F: GGAAGACCTACCTACGTTCAACC  | Validated     | KP275007 |

|      |                      |     |                                                           |               |          |
|------|----------------------|-----|-----------------------------------------------------------|---------------|----------|
| Dp78 | [AACC] <sub>6</sub>  | 100 | R: GGTGATGGCCATGATGATTA<br>F: AGTTATTGCAAATGTTAAAGTTGGTG  | Validated     | KP275008 |
| Dp79 | [AAC] <sub>5</sub>   | 100 | R: CCACTAAAGTATTGGGGGACA<br>F: TGGTGTAAGTTAGCCATGCAA      | Validated     | KP275009 |
| Dp80 | [ACA] <sub>5</sub>   | 113 | R: TTTGTAGCTTAATTGCCGAAA<br>F: AGCGAACCATAGCTCGTACC       | Validated     | KP275010 |
| Dp81 | [GTCT] <sub>6</sub>  | 138 | R: GCTTAAATCAAACGATTCAAGTGT<br>F: TGGCAGTCTCACTGTTCCACC   | Validated     | KP275011 |
| Dp82 | [GCAC] <sub>6</sub>  | 106 | R: TCAAAAACGGCTAGAAAACCTCC<br>F: CAGAATTGGACCAGTAGTTTAGGA | Validated     | KP275012 |
| Dp83 | [ACGG] <sub>7</sub>  | 294 | R: CCACGCTAATGTCATGGTCA<br>F: TGAGAAATAGCCCGGACAAA        | Not amplified | -        |
| Dp84 | [CGTC] <sub>11</sub> | 364 | R: GATATCCGACCTCCGTTCAA<br>F: TGTAGACCGTTTGAAACTTGC       | Validated     | KP275013 |
| Dp85 | [TCA] <sub>39</sub>  | 259 | R: AAGATCGGACAAGAAATGTGG<br>F: TTTGGGGTAAAAATGCCTGAC      | Validated     | KP275014 |
| Dp86 | [CGTC] <sub>5</sub>  | 312 | R: GATGATGATGGTGGTGTGG<br>F: GCAAAGGGAGAAAACCTGCAC        | Polymorphic   | JQ812996 |
| Dp87 | [AACC] <sub>7</sub>  | 302 | R: CACTGTCACCGTCGCACATA<br>F: GATGACCTTGACCTTTCACCA       | Not amplified | -        |
| Dp88 | [TTTA] <sub>7</sub>  | 238 | R: TGGGCATATGTCATCCTATGG<br>F: ATAGGCGCTCGATGTCAATG       | Validated     | KP275015 |
| Dp89 | [CGTC] <sub>8</sub>  | 275 | R: CAATAAGCGAGAGGGGTGAC<br>F: TTTTCACACAGCAGCCAAAG        | Polymorphic   | JQ812997 |
| Dp90 | [GGAC] <sub>6</sub>  | 216 | R: TGAGAAATAGCCCGGACAAA<br>F: GTTTTTGACCCAGCATGACC        | Validated     | KP275016 |
| Dp91 | [ATA] <sub>8</sub>   | 243 | R: CAAAGCGTATAGGGGGCATA<br>F: AAAGCGCACTCCGTACACT         | Not amplified | -        |
| Dp92 | [GACG] <sub>6</sub>  | 241 | R: CGTACATGCACAACACAACG<br>F: GAAATTGCTATCTGAAGCGACA      | Validated     | KP275017 |
| Dp93 | [AGAC] <sub>7</sub>  | 138 | R: GGTGATGCAGGGTCAAAAAC<br>F: TTTTGCATGATAAAAGTTCGTGA     | Validated     | KP275018 |

---

*R*: CCGGTATGTTTCCACCACT

---
