# Supplementary material for: Using Massive Parallel Sequencing for the Development, Validation, and Application of Population Genetics Markers in the Invasive Bivalve Zebra Mussel (Dreissena polymorpha)
Source: PubMed Central journal article supplement (PMC4364119; doi:10.1371/journal.pone.0120732), 2015-03-17
Supplement: pone.0120732.s004.pdf [file pone.0120732.s004.pdf]

S4\_Table. Allele frequencies for the 14 polymorphic microsatellite loci in the six locations.

Refer to Table S1 for Sample numbers.

| Locus | Allele | Ebro River Basin |       |       |       |       | Llobregat River Basin |
|-------|--------|------------------|-------|-------|-------|-------|-----------------------|
|       |        | 1                | 2     | 3     | 4     | 5     | 6                     |
| Dp1   | 299    | 0.1              | 0.2   | 0     | 0.25  | 0.429 | 0.125                 |
|       | 308    | 0.3              | 0.2   | 0.5   | 0.083 | 0.071 | 0.125                 |
|       | 314    | 0.2              | 0.2   | 0     | 0.25  | 0.429 | 0.125                 |
|       | 317    | 0.4              | 0.2   | 0.5   | 0.25  | 0.071 | 0.125                 |
|       | 323    | 0                | 0.2   | 0     | 0.167 | 0     | 0.5                   |
| Dp2   | 411    | 0                | 0     | 0     | 0     | 0.062 | 0                     |
|       | 429    | 0                | 0     | 0     | 0     | 0     | 0.1                   |
|       | 432    | 0                | 0     | 0     | 0.062 | 0.062 | 0                     |
|       | 435    | 0                | 0     | 0.375 | 0.312 | 0.188 | 0                     |
|       | 438    | 0                | 0     | 0.125 | 0     | 0     | 0                     |
|       | 441    | 1                | 0.812 | 0.375 | 0.375 | 0.188 | 0.5                   |
|       | 444    | 0                | 0     | 0.062 | 0.25  | 0.25  | 0.4                   |
|       | 453    | 0                | 0.188 | 0     | 0     | 0.25  | 0                     |
|       | 459    | 0                | 0     | 0.062 | 0     | 0     | 0                     |
| Dp7   | 430    | 0.438            | 0.625 | 0.125 | 0.688 | 0.375 | 0.214                 |
|       | 436    | 0.562            | 0.375 | 0.875 | 0.312 | 0.625 | 0.786                 |
| Dp30  | 233    | 0.312            | 0.25  | 0.125 | 0.125 | 0.125 | 0.357                 |
|       | 236    | 0.5              | 0.438 | 0.562 | 0.562 | 0.75  | 0.286                 |
|       | 242    | 0                | 0     | 0     | 0.188 | 0     | 0.286                 |
|       | 245    | 0.062            | 0.125 | 0.125 | 0     | 0     | 0.071                 |
|       | 251    | 0.125            | 0.125 | 0.188 | 0.125 | 0.125 | 0                     |
|       | 254    | 0                | 0.062 | 0     | 0     | 0     | 0                     |
| Dp31  | 250    | 0.125            | 0.062 | 0     | 0.125 | 0.062 | 0                     |
|       | 253    | 0.062            | 0.062 | 0     | 0.062 | 0.188 | 0.143                 |
|       | 262    | 0.125            | 0.062 | 0.312 | 0.375 | 0.25  | 0.214                 |
|       | 277    | 0                | 0     | 0.062 | 0     | 0     | 0                     |
|       | 280    | 0.062            | 0.125 | 0.125 | 0.188 | 0.062 | 0                     |
|       | 283    | 0.312            | 0.188 | 0.188 | 0.062 | 0.25  | 0.5                   |
|       | 295    | 0.062            | 0     | 0.062 | 0     | 0.125 | 0                     |
|       | 307    | 0.062            | 0.062 | 0     | 0     | 0     | 0                     |
|       | 310    | 0.062            | 0     | 0.062 | 0     | 0     | 0.071                 |
|       | 313    | 0.062            | 0.062 | 0     | 0     | 0     | 0                     |
|       | 325    | 0.062            | 0.312 | 0.125 | 0.188 | 0.062 | 0.071                 |
|       | 328    | 0                | 0.062 | 0     | 0     | 0     | 0                     |
|       | 337    | 0                | 0     | 0.062 | 0     | 0     | 0                     |
|       | Dp39   | 404              | 0.312 | 0.375 | 0.25  | 0.312 | 0.312                 |
| 408   |        | 0.188            | 0.125 | 0.312 | 0.375 | 0.188 | 0.75                  |
| 412   |        | 0.5              | 0.5   | 0.438 | 0.312 | 0.5   | 0.188                 |
| Dp42  | 261    | 0.125            | 0.25  | 0.375 | 0.25  | 0.312 | 0.188                 |
|       | 265    | 0.125            | 0.312 | 0.125 | 0.125 | 0.312 | 0.125                 |
|       | 277    | 0.75             | 0.438 | 0.5   | 0.625 | 0.375 | 0.688                 |
| Dp43  | 242    | 0                | 0     | 0     | 0     | 0     | 0.071                 |
|       | 260    | 0.812            | 0.625 | 0.75  | 0.938 | 0.688 | 0.857                 |
|       | 263    | 0                | 0     | 0     | 0     | 0.125 | 0                     |
|       | 269    | 0.062            | 0.125 | 0.188 | 0.062 | 0.188 | 0.071                 |
|       | 278    | 0.125            | 0.25  | 0.062 | 0     | 0     | 0                     |
| Dp44  | 156    | 0                | 0.125 | 0     | 0     | 0.062 | 0                     |
|       | 160    | 0.188            | 0.062 | 0.125 | 0.312 | 0.125 | 0.071                 |
|       | 164    | 0.062            | 0.312 | 0.562 | 0.5   | 0.438 | 0.357                 |

|      |     |       |       |       |       |       |       |
|------|-----|-------|-------|-------|-------|-------|-------|
|      | 168 | 0     | 0     | 0     | 0     | 0.188 | 0     |
|      | 172 | 0.75  | 0.5   | 0.312 | 0.188 | 0.188 | 0.571 |
| Dp68 | 310 | 0.875 | 0.875 | 0.938 | 0.812 | 0.938 | 0.857 |
|      | 315 | 0.125 | 0.125 | 0.062 | 0.125 | 0.062 | 0.143 |
|      | 320 | 0     | 0     | 0     | 0.062 | 0     | 0     |
| Dp72 | 397 | 0.562 | 0.25  | 0.25  | 0.438 | 0.188 | 0     |
|      | 401 | 0.438 | 0.75  | 0.75  | 0.562 | 0.812 | 1     |
| Dp74 | 351 | 0.125 | 0.125 | 0.125 | 0.188 | 0.188 | 0.083 |
|      | 371 | 0.625 | 0.688 | 0.438 | 0.5   | 0.562 | 0.75  |
|      | 379 | 0.25  | 0.188 | 0.438 | 0.312 | 0.25  | 0.167 |
| Dp86 | 324 | 0.375 | 0.25  | 0.375 | 0.5   | 0.5   | 0.562 |
|      | 328 | 0.188 | 0.25  | 0.438 | 0.188 | 0.188 | 0.25  |
|      | 332 | 0.062 | 0.125 | 0.062 | 0.188 | 0.125 | 0.125 |
|      | 336 | 0.375 | 0.375 | 0.125 | 0.125 | 0.188 | 0.062 |
| Dp89 | 279 | 0.062 | 0     | 0     | 0     | 0.062 | 0     |
|      | 291 | 0.25  | 0.438 | 0.188 | 0.562 | 0.375 | 0.5   |
|      | 299 | 0.625 | 0.5   | 0.812 | 0.438 | 0.562 | 0.5   |
|      | 303 | 0.062 | 0.062 | 0     | 0     | 0     | 0     |
