# Supplementary material for: Using Massive Parallel Sequencing for the Development, Validation, and Application of Population Genetics Markers in the Invasive Bivalve Zebra Mussel (Dreissena polymorpha)
Source: PubMed Central journal article supplement (PMC4364119; doi:10.1371/journal.pone.0120732), 2015-03-17
Supplement: pone.0120732.s005.pdf [file pone.0120732.s005.pdf]

S5\_Table. Pairwise  $F_{ST}$  values among populations.

Above diagonal: pairwise  $F_{ST}$  values. Below diagonal: P-values obtained after 300 permutations. Refer to Table S1 for sample numbers.

|   | Ebro River Basin |        |         |         |         | Llobregat River Basin |
|---|------------------|--------|---------|---------|---------|-----------------------|
|   | 1                | 2      | 3       | 4       | 5       | 6                     |
| 1 |                  | -0.009 | 0.062   | 0.0539  | 0.0783  | 0.0985                |
| 2 | 0.84333          |        | 0.0451  | 0.0147  | 0.0146  | 0.0622                |
| 3 | 0.16333          | 0.05   |         | 0.0354  | 0.0276  | 0.0683                |
| 4 | 0.03667          | 0.1    | 0.26    |         | -0.0013 | 0.0586                |
| 5 | 0.05667          | 0.23   | 0.10333 | 0.73667 |         | 0.0619                |
| 6 | 0.05             | 0.03   | 0.16    | 0.16333 | 0.15    |                       |
